Abstract  
Poster Session C

Friday, November 15, 2019 8:00 am – 9:30 am

AGING AND DEMENTIA: HEALTHY AGING AND COGNITION

C-21

**Emotional Predictors of Self-Reported Frontal Behavior Disruption in Older Adults**

*Dorenkamp M, Irrgang M, Jacova C, Reohr P, Smith S, Vik P*

**Objective:** Behavioral manifestations of executive dysfunction (e.g., apathy) include internal experiences subject to informant misinterpretation. Self-reports of these functions, however, may be influenced by subjective cognitive concerns (SCC). The purpose of this study was to assess emotional distress and SCC as predictors of self-reported frontal behavior disruption. **Method:** Twenty-one women and 18 men aged 55 to 83 ( $M = 66$ ), completed measures of emotional functioning and SCC. The Frontal Systems Behavior Scale (FrSBe) measured frontal behavior concerns, which provided three subscales (Apathy, Disinhibition, Executive Function) and a total score. Emotional functioning was measured with the Patient Health Questionnaire, 9-item (PHQ-9), Generalized Anxiety Disorder, 7-item (GAD-7), and the Dementia Worry Scale (DWS). SCCs were measured using the Cognitive Function- Short-Form 6a (CFSF). **Results:** FrSBe scores were regressed on PHQ-9, GAD-7, CFSF, and DWS. Apathy was predicted by PHQ ( $B = 1.02$ ,  $CI: .49$  to  $1.55$ ,  $sr^2 = .151$ ), CFSF ( $B = -.42$ ,  $CI: -.75$  to  $-.10$ ,  $sr^2 = .071$ ), and DWS ( $B = .14$ ,  $CI: .02$  to  $.26$ ,  $sr^2 = .052$ ). Disinhibition was predicted by CFSF ( $B = -.61$ ,  $CI: -1.06$  to  $-.15$ ,  $sr^2 = .134$ ). Executive dysfunction was predicted by DWS ( $B = .22$ ,  $CI: .02$  to  $.41$ ,  $sr^2 = .080$ ). Trends were found for PHQ and CFSF to predict Executive Dysfunction. **Conclusions:** Depression, dementia worry, and SCC predicted aspects of perceived frontal behavior disruption, particularly apathy. Subjective cognitive concern predicted perceived apathy and disinhibition; dementia worry predicted perceived apathy and executive dysfunction. Depression was only predictive of perceived apathy. These findings support the relationship between depression, dementia worry, SCC, and self-reported behavioral disruption emphasizing the importance of emotions and SCC in self-reported behavioral functioning.
